# Supplementary material for: Multi-platform whole genome sequencing for tuberculosis clinical and surveillance applications
Source: PubMed Central journal article supplement (PMC10908857; doi:10.1038/s41598-024-55865-1), 2024-03-03
Supplement: 41598_2024_55865_MOESM1_ESM.pdf [file 41598_2024_55865_MOESM1_ESM.pdf]

Table S1

Study isolates undergoing sequencing using Illumina and Oxford Nanopore Technology (ONT) platforms

(N=59)

| Sample | Illumina<br>Accession no. | ONT<br>accession no. | Lineage*  | Drug<br>Resistance** | Drug resistance Mutations**                                                                                                                                                                          |
|--------|---------------------------|----------------------|-----------|----------------------|------------------------------------------------------------------------------------------------------------------------------------------------------------------------------------------------------|
| S1     | ERR12328206               | ERR12328582          | 1.2.1.2.1 | Sensitive            |                                                                                                                                                                                                      |
| S2     | ERR12328205               | ERR12328581          | 1.2.1.2.1 | Sensitive            |                                                                                                                                                                                                      |
| S4     | ERR12328204               | ERR12328580          | 1.1.1     | Sensitive            |                                                                                                                                                                                                      |
| S5     | ERR12328203               | ERR12328579          | 2.2.1     | Other                | Streptomycin <i>gid</i> 351delG                                                                                                                                                                      |
| S8     | ERR12328202               | ERR12328578          | 2.1       | Sensitive            |                                                                                                                                                                                                      |
| S11    | ERR12328201               | ERR12328577          | 1.1.1     | Sensitive            |                                                                                                                                                                                                      |
| S12    | ERR12328200               | ERR12328576          | 2.2.1     | Sensitive            |                                                                                                                                                                                                      |
| S13    | ERR12328199               | ERR12328575          | 1.1.3.1   | Sensitive            |                                                                                                                                                                                                      |
| S14    | ERR12328198               | ERR12328574          | 4.8       | Sensitive            |                                                                                                                                                                                                      |
| S15    | ERR12328197               | ERR12328573          | 2.2.1     | Sensitive            |                                                                                                                                                                                                      |
| S17    | ERR12328196               | ERR12328572          | 1.1.1     | Sensitive            |                                                                                                                                                                                                      |
| S19    | ERR12328195               | ERR12328571          | 1.1.1.1   | Other                | Streptomycin <i>gid</i> Glu92                                                                                                                                                                        |
| S20    | ERR12328194               | ERR12328570          | 1.2.1.2   | Sensitive            |                                                                                                                                                                                                      |
| S21    | ERR12328193               | ERR12328569          | 2.2.1.1   | Sensitive            |                                                                                                                                                                                                      |
| S22    | ERR12328192               | ERR12328568          | 1.1.1     | Sensitive            |                                                                                                                                                                                                      |
| S23    | ERR12328191               | ERR12328567          | 1.1.1     | Sensitive            |                                                                                                                                                                                                      |
| S24    | ERR12328190               | ERR12328566          | 2.2.1     | Other                | FQs <i>gyrB</i> Asp494Ala ***                                                                                                                                                                        |
| S25    | ERR12328189               | ERR12328565          | 2.2.1     | Sensitive            |                                                                                                                                                                                                      |
| S26    | ERR12328188               | ERR12328564          | 2.2.1     | RR-TB                | <i>rpoB</i> Ser450Trp                                                                                                                                                                                |
| S27    | ERR12328187               | ERR12328563          | 2.2.1.1   | Pre-XDR-TB           | Rifampicin <i>rpoB</i> Ser450Trp;<br>Isoniazid <i>katG</i> Ser315Thr;<br>Ethambutol <i>embA</i> -16C>T;<br>PAS <i>thyX</i> -16C>T;<br>Streptomycin <i>rpsL</i> Lys43Arg;<br>FQs <i>gyrA</i> Asp94Gly |
| S28    | ERR12328186               | ERR12328562          | 1.2.1.2.1 | Other                | Pyrazinamide <i>pncA</i> Ser104Arg;<br>Ethionamide <i>ethA</i> Thr232Ala                                                                                                                             |
| S29    | ERR12328185               | ERR12328561          | 1.2.1.2.1 | Other                | Pyrazinamide <i>pncA</i> Ser104Arg;<br>Ethionamide <i>ethA</i> Thr232Ala                                                                                                                             |
| S30    | ERR12328184               | ERR12328560          | 1.1.1     | Other                | Pyrazinamide <i>pncA</i> Thr142Lys;                                                                                                                                                                  |
| S31    | ERR12328183               | ERR12328559          | 1.2.1.2.1 | HR-TB                | Isoniazid <i>fabG1</i> -15C>T; Streptomycin<br><i>rpsL</i> Lys88Arg; Ethionamide <i>fabG1</i> -<br>15C>T;<br>Streptomycin <i>gid</i> c.351dupG                                                       |
| S32    | ERR12328182               | ERR12328558          | 1.2.1.2.1 | RR-TB                | Pyrazinamide <i>pncA</i> Ser104Arg;<br>Ethionamide <i>ethA</i> Thr232Ala;<br>Rifampicin <i>rpoB</i> Ser450Leu                                                                                        |
| S33    | ERR12328181               | ERR12328557          | 1.1.1     | MDR-TB               | Isoniazid <i>fabG1</i> -15C>T;<br>Ethionamide <i>fabG1</i> -15C>T;<br>Rifampicin <i>rpoB</i> Ser450Leu                                                                                               |
| S34    | ERR12328180               | ERR12328556          | 2.2.1     | HR-TB                | Isoniazid <i>katG</i> Ser315Thr;                                                                                                                                                                     |
| S35    | ERR12328179               | ERR12328555          | 2.2.1     | Other                | Streptomycin <i>rrs</i> 514A>C                                                                                                                                                                       |
| S36    | ERR12328178               | ERR12328554          | 1.1.1     | Sensitive            |                                                                                                                                                                                                      |
| S37    | ERR12328177               | ERR12328553          | 2.2.1     | HR-TB                | Isoniazid <i>katG</i> Ser315Thr;                                                                                                                                                                     |

|            |             |             |                     |           |                                                                                                                                                 |
|------------|-------------|-------------|---------------------|-----------|-------------------------------------------------------------------------------------------------------------------------------------------------|
| <b>S38</b> | ERR12328176 | ERR12328552 | 1.2.1.2.1,<br>1.1.1 | Sensitive |                                                                                                                                                 |
| <b>S39</b> | ERR12328175 | ERR12328551 | 1.1.1               | MDR-TB    | Isoniazid <i>fabG1</i> -15C>T;<br>Ethionamide <i>fabG1</i> -15C>T;<br>Rifampicin <i>rpoB</i> His445Tyr                                          |
| <b>S40</b> | ERR12328174 | ERR12328550 | 1.2.1.2.1           | Other     | Pyrazinamide <i>pncA</i> Ser104Arg;<br>Ethionamide <i>ethA</i> Thr232Ala                                                                        |
| <b>S41</b> | ERR12328173 | ERR12328549 | 1.1.1               | Sensitive |                                                                                                                                                 |
| <b>S42</b> | ERR12328172 | ERR12328548 | 2.2.1,1.1.<br>3.3   | HR-TB     | Isoniazid <i>katG</i> Ser315Thr                                                                                                                 |
| <b>S43</b> | ERR12328171 | ERR12328547 | 1.1.1               | Sensitive |                                                                                                                                                 |
| <b>S44</b> | ERR12328170 | ERR12328546 | 1.1.1               | HR-TB     | Isoniazid <i>fabG1</i> -15C>T;<br>Ethionamide <i>fabG1</i> -15C>T                                                                               |
| <b>S46</b> | ERR12328168 | ERR12328544 | 1.1.1               | HR-TB     | Isoniazid <i>katG</i> Ser315Thr                                                                                                                 |
| <b>S47</b> | ERR12328167 | ERR12328543 | 1.2.1.2.1           | Sensitive |                                                                                                                                                 |
| <b>S48</b> | ERR12328166 | ERR12328542 | 1.1.1               | Sensitive |                                                                                                                                                 |
| <b>S49</b> | ERR12328165 | ERR12328541 | 2.2.1               | MDR-TB    | Streptomycin <i>rpsL</i> Lys43Arg;<br>Ethambutol <i>embB</i> Met306Leu;<br>Rifampicin <i>rpoB</i> Ser450Leu;<br>Isoniazid <i>katG</i> Ser315Thr |
| <b>S50</b> | ERR12328164 | ERR12328540 | 2.2.1               | HR-TB     | Streptomycin <i>rpsL</i> Lys88Arg;<br>Isoniazid <i>katG</i> Ser315Thr                                                                           |
| <b>S52</b> | ERR12328163 | ERR12328539 | 1.1.1               | Other     | Ethambutol <i>embB</i> Arg507Lys                                                                                                                |
| <b>S53</b> | ERR12328162 | ERR12328538 | 4.5                 | Sensitive |                                                                                                                                                 |
| <b>S54</b> | ERR12328161 | ERR12328537 | 2.2.1.2             | Sensitive |                                                                                                                                                 |
| <b>S55</b> | ERR12328160 | ERR12328536 | 2.2.1.1             | Sensitive |                                                                                                                                                 |
| <b>S56</b> | ERR12328159 | ERR12328535 | 1.1.1               | Sensitive |                                                                                                                                                 |
| <b>S58</b> | ERR12328158 | ERR12328534 | 2.2.1               | MDR-TB    | Rifampicin <i>rpoB</i> His445Asp;<br><i>katG</i> Ser315.Thr                                                                                     |
| <b>S60</b> | ERR12328157 | ERR12328533 | 2.2.1               | Sensitive |                                                                                                                                                 |
| <b>S62</b> | ERR12328156 | ERR12328532 | 2.2.1               | HR-TB     | Isoniazid <i>katG</i> Ser315Thr                                                                                                                 |
| <b>S63</b> | ERR12328155 | ERR12328531 | 2.2.1               | Other     | Streptomycin <i>rrs</i> 514A>C                                                                                                                  |
| <b>S64</b> | ERR12328154 | ERR12328530 | 4.2,2.2             | Other     | Streptomycin <i>rrs</i> 517C>T                                                                                                                  |
| <b>S66</b> | ERR12328153 | ERR12328529 | 1.1.1               | Sensitive |                                                                                                                                                 |
| <b>S67</b> | ERR12328152 | ERR12328528 | 3                   | Sensitive |                                                                                                                                                 |
| <b>S68</b> | ERR12328151 | ERR12328527 | 2.2.1               | MDR-TB    | Rifampicin <i>rpoB</i> His445Tyr;<br>Isoniazid <i>katG</i> Ser315Thr                                                                            |
| <b>S69</b> | ERR12328150 | ERR12328526 | 2.2.1               | HR-TB     | Isoniazid <i>katG</i> 1002_1003dupGA;<br>Streptomycin <i>rpsL</i> Lys43Arg                                                                      |
| <b>S70</b> | ERR12328149 | ERR12328525 | 2.2.1               | HR-TB     | Isoniazid <i>fabG1</i> -15C>T;<br>Ethionamide <i>fabG1</i> -15C>T                                                                               |
| <b>S71</b> | ERR12328148 | ERR12328524 | 1.2.1.2.1           | Other     | Pyrazinamide <i>pncA</i> Ser104Arg;<br>Ethionamide <i>ethA</i> Thr232Ala                                                                        |
| <b>S72</b> | ERR12328147 | ERR12328523 | 2.2.1               | Sensitive |                                                                                                                                                 |

\* based on TB-Profiler, and matched identically between ONT and Illumina; \*\* based on TB-Profiler, and drug resistance type and mutations matched identically between platforms; HR-TB Isoniazid drug resistant; MDR-TB multidrug resistant TB; RR-TB rifampicin resistant TB, Fluoroquinolones (FQs): Moxifloxacin, Ofloxacin, Levofloxacin, Ciprofloxacin

**Table S2****Paired isolates (n=59) sequenced using Illumina and Oxford Nanopore Technology (ONT) platforms**

| <b>Sample</b> | <b>Platform</b> | <b>Ave. Depth</b> | <b>No. SNPS*</b> | <b>% Mapped</b> | <b>Total Reads</b> |
|---------------|-----------------|-------------------|------------------|-----------------|--------------------|
| <b>S1</b>     | ONT             | 5.4               | 1168             | 99.6%           | 6572               |
|               | Illumina        | 103.2             | 1954             | 98.8%           | 2963742            |
| <b>S2</b>     | ONT             | 13.5              | 1934             | 99.4%           | 19654              |
|               | Illumina        | 41.4              | 1944             | 98.8%           | 1176138            |
| <b>S4</b>     | ONT             | 9.9               | 1923             | 99.6%           | 17861              |
|               | Illumina        | 109.1             | 1985             | 98.8%           | 3137078            |
| <b>S5</b>     | ONT             | 6.1               | 985              | 99.8%           | 10075              |
|               | Illumina        | 78.3              | 1345             | 99.0%           | 2217701            |
| <b>S8</b>     | ONT             | 22.9              | 1322             | 100%            | 43766              |
|               | Illumina        | 73.2              | 1273             | 99.4%           | 2300179            |
| <b>S11</b>    | ONT             | 38.1              | 2095             | 99.2%           | 65534              |
|               | Illumina        | 100.1             | 1963             | 98.7%           | 2873142            |
| <b>S12</b>    | ONT             | 5.9               | 921              | 99.7%           | 15899              |
|               | Illumina        | 76.1              | 1376             | 99.0%           | 2163404            |
| <b>S13</b>    | ONT             | 9.2               | 1888             | 99.6%           | 17150              |
|               | Illumina        | 98.9              | 2012             | 98.8%           | 2837108            |
| <b>S14</b>    | ONT             | 31.7              | 548              | 99.8%           | 21618              |
|               | Illumina        | 135.5             | 561              | 99.6%           | 3912222            |
| <b>S15</b>    | ONT             | 23.9              | 1353             | 96.2%           | 28957              |
|               | Illumina        | 89.6              | 1313             | 98.9%           | 2561666            |
| <b>S17</b>    | ONT             | 11.7              | 1990             | 99.8%           | 18354              |
|               | Illumina        | 112.9             | 1952             | 98.9%           | 3260628            |
| <b>S19</b>    | ONT             | 15.2              | 1953             | 99.8%           | 22559              |
|               | Illumina        | 74.8              | 1971             | 98.8%           | 2121102            |
| <b>S20</b>    | ONT             | 10.2              | 1856             | 99.7%           | 24968              |
|               | Illumina        | 76.1              | 1925             | 98.8%           | 2164348            |
| <b>S21</b>    | ONT             | 18.1              | 1304             | 99.6%           | 32668              |
|               | Illumina        | 92.2              | 1316             | 99.0%           | 2634471            |
| <b>S22</b>    | ONT             | 10.7              | 1963             | 99.7%           | 9765               |
|               | Illumina        | 121.3             | 1967             | 98.8%           | 3506999            |
| <b>S23</b>    | ONT             | 27.1              | 2008             | 99.7%           | 38927              |
|               | Illumina        | 112.1             | 1959             | 98.7%           | 3227903            |
| <b>S24</b>    | ONT             | 30.4              | 1356             | 99.4%           | 70506              |
|               | Illumina        | 28.0              | 1296             | 99.0%           | 791827             |
| <b>S25</b>    | ONT             | 19.4              | 1263             | 92.7%           | 70402              |
|               | Illumina        | 80.7              | 1249             | 94.8%           | 2430535            |
| <b>S26</b>    | ONT             | 21.1              | 1321             | 99.8%           | 67333              |
|               | Illumina        | 54.1              | 1318             | 99.1%           | 1524118            |
| <b>S27</b>    | ONT             | 17.7              | 1508             | 88.9%           | 50492              |
|               | Illumina        | 53.4              | 1316             | 99.1%           | 1524609            |
| <b>S28</b>    | ONT             | 27.7              | 1955             | 99.6%           | 63762              |
|               | Illumina        | 79.9              | 1952             | 98.7%           | 2267204            |
| <b>S29</b>    | ONT             | 15.8              | 1947             | 99.6%           | 42272              |

|            |          |       |      |       |         |
|------------|----------|-------|------|-------|---------|
|            | Illumina | 74.5  | 1943 | 98.5% | 2107027 |
|            | ONT      | 15.1  | 1927 | 99.5% | 16899   |
| <b>S30</b> | Illumina | 105.8 | 1931 | 98.6% | 3018371 |
|            | ONT      | 14.9  | 1947 | 99.6% | 19093   |
| <b>S31</b> | Illumina | 109.9 | 1932 | 98.8% | 3153821 |
|            | ONT      | 24.7  | 1952 | 99.5% | 59494   |
| <b>S32</b> | Illumina | 52.6  | 1955 | 98.7% | 1487658 |
|            | ONT      | 13.9  | 1991 | 99.6% | 16399   |
| <b>S33</b> | Illumina | 110.7 | 1958 | 98.8% | 3187457 |
|            | ONT      | 16.0  | 1332 | 99.8% | 28349   |
| <b>S34</b> | Illumina | 108.4 | 1330 | 98.9% | 3076148 |
|            | ONT      | 21.4  | 1330 | 99.6% | 99886   |
| <b>S35</b> | Illumina | 49.6  | 1313 | 98.9% | 1394378 |
|            | ONT      | 8.0   | 1713 | 92.4% | 9976    |
| <b>S36</b> | Illumina | 139.3 | 1956 | 98.6% | 4019976 |
|            | ONT      | 19.7  | 1311 | 99.7% | 89722   |
| <b>S37</b> | Illumina | 70.3  | 1319 | 99.1% | 2002450 |
|            | ONT      | 22.5  | 1926 | 99.5% | 67398   |
| <b>S38</b> | Illumina | 74.4  | 1919 | 98.8% | 2141460 |
|            | ONT      | 22.9  | 1958 | 99.2% | 78058   |
| <b>S39</b> | Illumina | 84.1  | 1950 | 98.6% | 2396636 |
|            | ONT      | 17.2  | 1975 | 99.5% | 24331   |
| <b>S40</b> | Illumina | 110.0 | 1952 | 98.6% | 3138449 |
|            | ONT      | 15.6  | 2000 | 99.6% | 27693   |
| <b>S41</b> | Illumina | 137.5 | 1976 | 98.7% | 3971276 |
|            | ONT      | 16.8  | 1328 | 99.5% | 53347   |
| <b>S42</b> | Illumina | 25.1  | 1298 | 98.9% | 707135  |
|            | ONT      | 28.9  | 1997 | 99.6% | 34487   |
| <b>S43</b> | Illumina | 143.5 | 1972 | 98.8% | 4174158 |
|            | ONT      | 19.4  | 1922 | 99.5% | 34342   |
| <b>S44</b> | Illumina | 91.5  | 1919 | 98.7% | 2617699 |
|            | ONT      | 21.5  | 1971 | 99.6% | 31625   |
| <b>S46</b> | Illumina | 115.6 | 1959 | 98.7% | 3309928 |
|            | ONT      | 22.3  | 1948 | 99.4% | 31052   |
| <b>S47</b> | Illumina | 134.6 | 1958 | 98.8% | 3911533 |
|            | ONT      | 22.1  | 1947 | 99.3% | 36838   |
| <b>S48</b> | Illumina | 111.0 | 1963 | 98.7% | 3190331 |
|            | ONT      | 13.9  | 1323 | 99.7% | 52942   |
| <b>S49</b> | Illumina | 74.2  | 1327 | 99.0% | 2108101 |
|            | ONT      | 21.0  | 1326 | 99.7% | 80478   |
| <b>S50</b> | Illumina | 48.7  | 1338 | 99.0% | 1373152 |
|            | ONT      | 7.3   | 1625 | 99.5% | 8682    |
| <b>S52</b> | Illumina | 131.0 | 1972 | 98.6% | 3779393 |
|            | ONT      | 6.0   | 556  | 99.6% | 9726    |
| <b>S53</b> | Illumina | 130.5 | 839  | 99.0% | 3780609 |
|            | ONT      | 13.9  | 1336 | 99.6% | 27161   |
| <b>S54</b> | Illumina | 114.0 | 1335 | 98.9% | 3268429 |
| <b>S55</b> | ONT      | 15.6  | 1287 | 99.7% | 36221   |

|            |          |       |      |       |         |
|------------|----------|-------|------|-------|---------|
|            | Illumina | 110.9 | 1309 | 99.0% | 3176478 |
|            | ONT      | 19.1  | 1961 | 99.4% | 49455   |
| <b>S56</b> | Illumina | 128.7 | 1964 | 98.9% | 3731460 |
|            | ONT      | 7.0   | 1042 | 98.4% | 24233   |
| <b>S58</b> | Illumina | 106.1 | 1345 | 98.5% | 3029658 |
|            | ONT      | 16.3  | 1260 | 99.6% | 53081   |
| <b>S60</b> | Illumina | 83.3  | 1269 | 98.9% | 2366676 |
|            | ONT      | 28.0  | 1294 | 99.2% | 111928  |
| <b>S62</b> | Illumina | 60.8  | 1313 | 99.0% | 1726068 |
|            | ONT      | 14.4  | 1251 | 99.6% | 20474   |
| <b>S63</b> | Illumina | 116.8 | 1258 | 98.9% | 3344554 |
|            | ONT      | 9.0   | 1154 | 99.5% | 22348   |
| <b>S64</b> | Illumina | 89.3  | 1328 | 98.7% | 2534586 |
|            | ONT      | 6.6   | 1513 | 98.9% | 17966   |
| <b>S66</b> | Illumina | 33.2  | 1934 | 97.9% | 1513368 |
|            | ONT      | 21.8  | 1363 | 99.7% | 46238   |
| <b>S67</b> | Illumina | 120.8 | 1327 | 99.1% | 3475969 |
|            | ONT      | 23.9  | 1340 | 99.4% | 121132  |
| <b>S68</b> | Illumina | 68.6  | 1367 | 99.0% | 1949008 |
|            | ONT      | 20.3  | 1302 | 99.6% | 116354  |
| <b>S69</b> | Illumina | 39.2  | 1315 | 98.9% | 1099998 |
|            | ONT      | 12.7  | 1270 | 99.7% | 34644   |
| <b>S70</b> | Illumina | 75.8  | 1278 | 98.9% | 2140778 |
|            | ONT      | 17.4  | 1929 | 99.6% | 41764   |
| <b>S71</b> | Illumina | 105.5 | 1945 | 98.7% | 3017563 |
|            | ONT      | 22.0  | 1295 | 93.4% | 120256  |
| <b>S72</b> | Illumina | 47.7  | 1254 | 98.8% | 1344865 |

---

\* High quality SNPs obtained at an alternate frequency of 0.7

\*\* including low depth SNPs due to entire sample being lower than the cut-off (of 5)

**Table S3**

**Regions of difference (RD) deletions detected using the Oxford Nanopore Technology (ONT) platform**

| <b>Sample</b> | <b>Lineage</b> | <b>RD*</b>                                                                   |
|---------------|----------------|------------------------------------------------------------------------------|
| S1            | 1.2.1.2.1      | RD147c, Rdbovis_wbbl2, RD715, RD239, RD210                                   |
| S2            | 1.2.1.2.1      | RD147c, Rdbovis_wbbl2, RD715, RD239, RD210, <u>RD131e</u>                    |
| S4            | 1.1.1          | RD715, RD147c, Rdbovis_wbbl2, RD239, RD11, RD3, RD236a, RD131e, DS70         |
| S5            | 2.2.1          | RD105, RD3, RD152, RD715, RD206, MiD1                                        |
| S8            | 2.1            | RD105, RD715, RD720, RD721, RD152, RD314, N-RD25_tbB, RD131e                 |
| S11           | 1.1.1          | RD11 RD715, RD147c, Rdbovis_wbbl2, RD3, RD236, RD239, <u>RD131e</u> , DS70   |
| S12           | 2.2.1          | RD105, RD181, RD311, RD3, RD181, RD311, RD3, RD207, RD715                    |
| S13           | 1.1.3.1        | RD715, RD147c, Rdbovis_wbbl2, RD239, RD11, RD131e, RD5sur                    |
| S14           | 4.8            | RD247b, RD715, MID4, RD219                                                   |
| S15           | 2.2.1          | RD105, RD3, RD181, RD715, RD313, RD207, <u>RD131e</u> , RD152                |
| S17           | 1.1.1          | RD715, RD147c, Rdbovis_wbbl2, RD239, RD11, RD3, RD236a, RD239                |
| S19           | 1.1.1.1        | RD715, RD147c, Rdbovis_wbbl2, RD239, RD11, RD3, RD236a, RD239                |
| S20           | 1.2.1.2        | RD147c, Rdbovis_wbbl2, RD715, RD239, RD121, <u>RD131e</u>                    |
| S21           | 2.2.1.1        | RD105, RD715, RD3, RD150, RD152, RD181, RD311                                |
| S22           | 1.1.1          | RD715, RD147c, Rdbovis_wbbl2, RD239, RD11, RD131e, RD3, RD313, RD236a        |
| S23           | 1.1.1          | RD715, RD147c, Rdbovis_wbbl2, RD239, RD11, RD236a, <u>RD131e</u>             |
| S24           | 2.2.1          | RD105, RD715, RD3, RD152, RD181, MiD1                                        |
| S25           | 2.2.1          | RD105, RD715, RD131e, RD3, RD152, RD181, <u>RD131e</u> , RD207               |
| S26           | 2.2.1          | RD105, RD715, RD3, RD152, RD181, RD311                                       |
| S27           | 2.2.1.1        | RD105, RD715, RD3, RD150, RD152, RD181, RD311                                |
| S28           | 1.2.1.2.1      | RD147c, Rdbovis_wbbl2, RD715, RD239, RD210                                   |
| S29           | 1.2.1.2.1      | RD147c, Rdbovis_wbbl2, RD715, RD239, <u>RD131e</u> , RD210                   |
| S30           | 1.1.1          | RD715, RD147c, Rdbovis_wbbl2, RD239, RD11, RD3, RD236a, <u>RD131e</u>        |
| S31           | 1.2.1.2.1      | RD147c, Rdbovis_wbbl2, RD715, RD239, <u>RD131e</u> , RD210                   |
| S32           | 1.2.1.2.1      | RD147c, Rdbovis_wbbl2, RD715, RD239, <u>RD131e</u> , RD210                   |
| S33           | 1.1.1          | RD715, RD147c, Rdbovis_wbbl2, RD239, RD11, RD3, RD236a, <u>RD131e</u> , DS70 |
| S34           | 2.2.1          | RD105, RD715, RD152, RD3, RD311, RD181, MiD1                                 |
| S35           | 2.2.1          | RD105, RD715, RD152, RD3, RD311, RD181, MiD1                                 |
| S36           | 1.1.1          | RD715, RD147c, Rdbovis_wbbl2, RD239, RD11, RD236a, <u>RD131e</u>             |
| S37           | 2.2.1          | RD105, RD715, RD152, RD3, RD311, RD181, MiD1                                 |
| S38           | 1.2.1.2.1      | RD147c, Rdbovis_wbbl2, RD715, RD239, <u>RD131e</u>                           |
| S39           | 1.1.1          | RD715, RD147c, Rdbovis_wbbl2, RD239, RD11, RD3, RD313, RD236a, RD131e        |
| S40           | 1.2.1.2.1      | RD147c, Rdbovis_wbbl2, RD715, RD239, RD210                                   |
| S41           | 1.1.1          | RD715, RD147c, Rdbovis_wbbl2, RD239, RD11, RD3, RD236a, RD131e, DS70         |
| S42           | 2.2.1          | RD105, RD715, <u>RD3</u> , <u>RD152</u>                                      |
| S43           | 1.1.1          | RD715, RD147c, Rdbovis_wbbl2, RD239, RD11, RD3, RD236a, RD131e               |
| S44           | 1.1.1.1        | RD715, RD147c, Rdbovis_wbbl2, RD239, RD11, RD3, RD236a, <u>RD131e</u>        |
| S46           | 1.1.1          | RD715, RD147c, Rdbovis_wbbl2, RD239, RD11, RD3, RD236a, DS70, <u>MiD4</u>    |
| S47           | 1.2.1.2.1      | RD147c, Rdbovis_wbbl2, RD715, RD239, RD210                                   |
| S48           | 1.1.1          | RD715, RD147c, Rdbovis_wbbl2, RD239, RD11, RD3, <u>RD131e</u> , <u>DS70</u>  |

|     |           |                                                              |
|-----|-----------|--------------------------------------------------------------|
| S49 | 2.2.1     | RD105, RD715, RD3, RD152, RD181, RD311                       |
| S50 | 2.2.1     | RD105, RD715, RD3, RD152, RD181, RD311                       |
| S52 | 1.1.1     | RD715, RD147c, RDbovis_wbbl2, RD239, RD11, RD3, RD236a       |
| S53 | 4.5       | RD715, RD122, RD147c, RDbovis_wbbl2, RD239                   |
| S54 | 2.2.1.2   | RD105, RD715, RD301, RD142, RD3, RD152, RD181, RD311         |
| S55 | 2.2.1.1   | RD105, RD715, RD3, RD150, RD152, RD181, RD311                |
| S56 | 1.1.1     | RD715, RD147c, RDbovis_wbbl2, RD239, RD11, RD3, RD236a, DS70 |
| S58 | 2.2.1     | RD105, RD715, RD3, RD152, RD181, RD311                       |
| S60 | 2.2.1     | RD105, RD715, RD181                                          |
| S62 | 2.2.1     | RD105, RD715, RD3, RD152, RD181, RD311                       |
| S63 | 2.2.1     | RD105, RD715, RD3, RD152, RD181, RD131e                      |
| S64 | 2.2.1     | RD105, RD715, <u>RD152, RD181</u>                            |
| S65 | 1.1.1     | RD715, RD147c, RDbovis_wbbl2, RD239, RD11, RD236a            |
| S66 | 1.1.1     | RD715, RD147c, RDbovis_wbbl2, RD239, RD11, RD236a, DS70      |
| S67 | 3         | RD715, RD152, RD750, RD316, N-RD25_tbA                       |
| S68 | 2.2.1     | RD105, RD715, RD181, RD311                                   |
| S69 | 2.2.1     | RD105, RD715, RD3, RD152, RD181, RD311                       |
| S70 | 2.2.1     | RD105, RD715, RD3, RD152, RS311                              |
| S71 | 1.2.1.2.1 | RD147c, RDbovis_wbbl2, RD715, RD239, <u>RD131e</u>           |
| S72 | 2.2.1     | RD105, RD715, RD3, RD152, RD181, <u>RD131e</u>               |

---

\* according to RDScan; \*\* underlined if not confirmed by Illumina

**Table S4**  
**Deletion analysis of Structural Variants in *pe/ppe* genes**

| <b>Gene (locus)</b>           | <b>SV identified</b>                          | <b>Lineage (n)</b>                                               | <b>Known*</b>                                                                                    |
|-------------------------------|-----------------------------------------------|------------------------------------------------------------------|--------------------------------------------------------------------------------------------------|
| <i>pe_pgrs1</i><br>(Rv0109)   | Truncated                                     | 1.1.1 (1/17)                                                     |                                                                                                  |
| <i>pe_pgrs2</i><br>(Rv0124)   | Truncated                                     | 1.2.1.2.1 (10/10)<br>1.2.1.2 (1/1)                               | Deleted in L6 (RD701), truncated in L4.3.3                                                       |
| <i>pe_pgrs3</i><br>(Rv0278c)  | Gene fusion                                   | 2 (25/25)                                                        | Gene fusion with <i>pe_pgrS4</i> in L2                                                           |
| <i>pe_pgrs4</i><br>(Rv0279c)  | Gene fusion                                   | 2 (25/25)                                                        | Gene fusion with <i>pe_pgrS3</i> in L2                                                           |
| <i>ppe5</i><br>(Rv0304c)      | Deletions                                     | 1.1.1 (2/17), 2.2.1 (1/20)                                       | Truncated in L5/6/ <i>bovis</i> and in sporadic samples                                          |
| <i>ppe6</i><br>(Rv0305c)      | Small deletion                                | 2.2.1 (2/20)                                                     | Deletions in several sub-lineages                                                                |
| <i>ppe8</i><br>(Rv0355c)      | Truncated and Deletion                        | 1 (29/30), 2 (24/25), 4.2 (1/1)                                  | Truncated in some L2, and deletion in some ancient lineages                                      |
| <i>pe_pgrs6</i><br>(Rv0532)   | Truncated                                     | 1.2.1.2.1 (10/10)                                                | Truncated in ancient lineages                                                                    |
| <i>pe_pgrs7</i><br>(Rv0578c)  | Deletions                                     | Large (1.1.1 (6/17))<br>Small (1.2.1.2.1 10/10,<br>1.2.1.2 1/1)  |                                                                                                  |
| <i>pe_pgrs8</i><br>(Rv0742)   | Truncated                                     | 1 (30/30)                                                        |                                                                                                  |
| <i>pe_pgrs9</i><br>(Rv0746)   | Truncated                                     | End(1 30/30)<br>Beginning(2 25/25)                               | Truncated in sporadic samples                                                                    |
| <i>pe_pgrs10</i><br>(Rv0747)  | Truncated                                     | 1.2.1.2.1 (2/10), 2.2.1 (16/20), 2.2.1.1 (3/3), 3 (1/1)          | Truncated in L5 and sporadic samples                                                             |
| <i>pe_pgrs13</i><br>(Rv0833)  | Truncated                                     | 1.1.1 (2/17), 1.2.1.2.1 (2/10), 2 (17/25), 4.2 (1/1)             | Gene fusion with <i>pe_pgrs12</i> in ancient lineages, truncated in some L2 and sporadic samples |
| <i>pe_pgrs16</i><br>(Rv0977)  | Truncated                                     | 1.1.1 (6/17), 1.2.1.2.1 (1/10)                                   | Truncated in L4.1                                                                                |
| <i>pe_pgrs19</i><br>(Rv1067c) | Gene fusion (L1)                              | 1 (30/30)                                                        | Gene fusion with <i>pe_pgrs20</i> in L1                                                          |
| <i>pe_pgrs20</i><br>(Rv1068c) | Gene fusion (L1)                              | 1 (30/30)                                                        | Gene fusion with <i>pe_pgrs19</i> in L1                                                          |
| <i>pe_pgrs21</i><br>(Rv1087)  | Missing (L3) Truncated (L2)<br>Large Deletion | 1.1.1 (2/17), 1.2.1.2.1 (2/10), 2 (18/25), 3 (1/1), 4 (2/3)      | Differences in sequence in L3                                                                    |
| <i>pe_pgrs22</i><br>(Rv1091)  | Truncated                                     | 1 (30/30)                                                        | Truncated in L1.1.3 and L5                                                                       |
| <i>pe_pgrs23</i><br>(Rv1243c) | Large deletion and truncated                  | Large ( 1.2.1.2.1 10/10<br>1.2.1.2 1/1)<br>Truncations (2 25/25) | Truncated in L3                                                                                  |
| <i>pe_pgrs24</i><br>(Rv1325c) | Large deletion and Truncated                  | 1.1.1 (1/17)<br>1.1.3.1 (1/1)                                    |                                                                                                  |
| <i>pe_pgrs26</i><br>(Rv1441c) | Truncated                                     | 1.1.1 (7/17), 2.2.1 (2/20), 4 (2/3)                              |                                                                                                  |
| <i>pe_pgrs27</i><br>(Rv1450c) | Large deletion and truncated                  | 1.1.1 (1/17), 1.1.3.1 (1/1), 2.2.1 (3/20), 4.5 (1/1)             | Truncated in some samples, different sequences                                                   |



|                               |           |                                                                               |                                                                |
|-------------------------------|-----------|-------------------------------------------------------------------------------|----------------------------------------------------------------|
| <i>ppe24</i><br>(Rv1753c)     | Truncated | 1.1.1 (2/17), 1.1.3.1 (1/1),<br>2.2.1 (1/20), 3 (1/1), 4.5<br>(1/1)           |                                                                |
| <i>wag22</i><br>(Rv1759c)     | Deletion  | 2 (25/25), 3 (1/1), 4 (3/3)                                                   | Deleted in some samples (RD152)                                |
| <i>ppe25</i><br>(Rv1787)      | Truncated | 1.2.1.2.1 (1/10)                                                              | Deleted in some samples                                        |
| <i>pe_pgrs33</i><br>(Rv1818c) | Truncated | 1.2.1.2.1 (10/10), 1.2.1.2<br>(1/1), 3 (1/1), 4 (2/3)                         | Truncated in L1                                                |
| <i>ppe34</i><br>(Rv1917c)     | Truncated | 1 (25/30), 2.2.1 (2/20),<br>2.2.1.1 (1/3), 2.2.1.2<br>(1/1), 3 (1/1), 4 (2/3) | Truncated in most lineages due to<br>IS6110                    |
| <i>pe_pgrs35</i><br>(Rv1983)  | Missing   | 1.1.1.1 (1/1)                                                                 | Missing in sporadic samples                                    |
| <i>ppe38</i><br>(Rv2352c)     | Deletion  | 1.1.3.1 (1/1), 2.2.1 (1/20)                                                   | Deletion in L2 (RD185)                                         |
| <i>ppe39</i><br>(Rv2353c)     | Deletion  | 1.1.3.1 (1/1), 2.2.1 (1/1)                                                    | Deletion of beginning of the gene<br>in most isolates          |
| <i>ppe40</i><br>(Rv2356c)     | Truncated | 1.1.3.1 (1/1), 2.1 (1/1),<br>2.2.1 (1/20)                                     | Truncated in sporadic samples<br>(IS6110)                      |
| <i>pe_pgrs45</i><br>(Rv2615c) | Deletions | Large (2.2.1 (3/20))<br>Small (2 24/25)                                       |                                                                |
| <i>pe27</i><br>(Rv2769c)      | Deleted   | 2.2.1.1 (1/3)                                                                 |                                                                |
| <i>ppe44</i><br>(Rv2770c)     | Deleted   | 2.2.1.1 (1/3)                                                                 |                                                                |
| <i>ppe46</i><br>(Rv3018c)     | Deleted   | 1.1.1 (1/17), 1.1.3.1 (1/1),<br>1.2.1.2 (1/1), 4.8 (1/1)                      | Truncated in 4.1.1.3 (IS6110) and<br>in other sporadic samples |
| <i>pe27a</i><br>(Rv3018A)     | Deleted   | 1.1.1 (1/17), 1.1.3.1 (1/1),<br>1.2.1.2 (1/1), 4.8 (1/1)                      | Deleted in some samples                                        |
| <i>esxS/pe28</i><br>(Rv3020c) | Deleted   | 1.1.1 (1/17), 1.1.3.1 (1/1),<br>1.2.1.2 (1/1), 2.2.1 (1/20),<br>4 (2/3)       | Deleted in some samples                                        |
| <i>ppe47</i><br>(Rv3021c)     | Deleted   | 1.1.1 (1/17), 1.2.1.2 (1/1)                                                   | Pseudogene                                                     |
| <i>ppe48</i><br>(Rv3022c)     | Deleted   | 1.1.1 (1/17), 1.2.1.2 (1/1)                                                   | Pseudogene                                                     |
| <i>pe29</i><br>(Rv3022A)      | Deleted   | 2.2.1 (2/20)                                                                  |                                                                |
| <i>ppe50</i><br>(Rv3135)      | Deleted   | 1 30/30                                                                       | Deletion in L1                                                 |
| <i>ppe52</i><br>(Rv3144c)     | Truncated | 1.1.3.1 (1/1)                                                                 | Truncated in some L3                                           |
| <i>ppe53</i><br>(Rv3159c)     | Truncated | 1.1.1 (17/17), 1.1.1.1<br>(1/1)                                               | Truncated across most lineages                                 |
| <i>ppe54</i><br>(Rv3343c)     | Truncated | 1.1.1 (1/17), 1.2.1.2.1<br>(1/10), 2.2.1 (2/20), 3<br>(1/1)                   | Truncated in sporadic samples<br>(IS6110/big insertions)       |
| <i>pe_pgrs49</i><br>(Rv3344c) | Truncated | 1.1.1 (4/17), 1.2.1.2.1<br>(10/10), 2 (23/25), 3 (1/1)                        | Gene fusion with <i>pe_pgrs50</i><br>across several lineages   |
| <i>pe_pgrs50</i><br>(Rv3345c) | Deletion  | 1 (30/30), 2.1 (1/1), 2.2.1<br>(6/20)                                         | Truncated in L1 and some L2;                                   |

|                              |                |                                                                              |                                                                             |
|------------------------------|----------------|------------------------------------------------------------------------------|-----------------------------------------------------------------------------|
| <i>ppe55</i><br>(Rv3347c)    | Large deletion | 2.2.1 (1/1)                                                                  | Truncated in sporadic samples                                               |
| <i>ppe56</i><br>(Rv3350c)    | Truncated      | 1.1.1 (5/17)                                                                 | Truncated in L2 and L6                                                      |
| <i>pe_pgrs52</i><br>(Rv3388) | Truncated      | 1.2.1.2 (1/1), 1.2.1.2.1<br>(8/10), 2.2.1 (1/30)                             | Truncated in sporadic samples                                               |
| <i>pe_pgrs53</i><br>(Rv3507) | Truncated      | 1 (19/30), 2 (17/25), 4.2<br>(1/1)                                           | Truncated in L5 and some L2                                                 |
| <i>pe_pgrs54</i><br>(Rv3508) | Truncated      | 1 (26/30), 2 (16/25), 4<br>(2/3)                                             | Truncated in L6, some L3, and<br>sporadic samples                           |
| <i>pe_pgrs55</i><br>(Rv3511) | Gene fusion    | 1.1.1 (1/17), 1.2.1.2.1<br>(1/10)                                            | Truncated in L5; gene fusion with<br><i>pe_pgrs56</i> in some other samples |
| <i>pe_pgrs56</i><br>(Rv3512) | Gene fusion    | 1.1.1 (1/17), 1.2.1.2.1<br>(1/10)                                            | Gene fusion with <i>pe_pgrs55</i> in<br>some samples                        |
| <i>pe_pgrs57</i><br>(Rv3514) | Truncated      | 1.1.1 (11/17), 1.2.1.2<br>(1/1), 1.2.1.2.1 (5/10),<br>2.2.1 (1/1), 4.5 (1/1) | Truncated in L6, most of L2, and in<br>sporadic samples                     |
| <i>ppe66</i><br>(Rv3738c)    | Deletion       | 2.1 (1/1)<br>3 (1/1)                                                         | Deleted in L3                                                               |
| <i>ppe67</i><br>(Rv3739c)    | Truncated      | 3 (1/1)                                                                      | Truncated in L3                                                             |

\* found in Gómez-González et al. [12]

Figure S1

Whole genome analysis pipeline

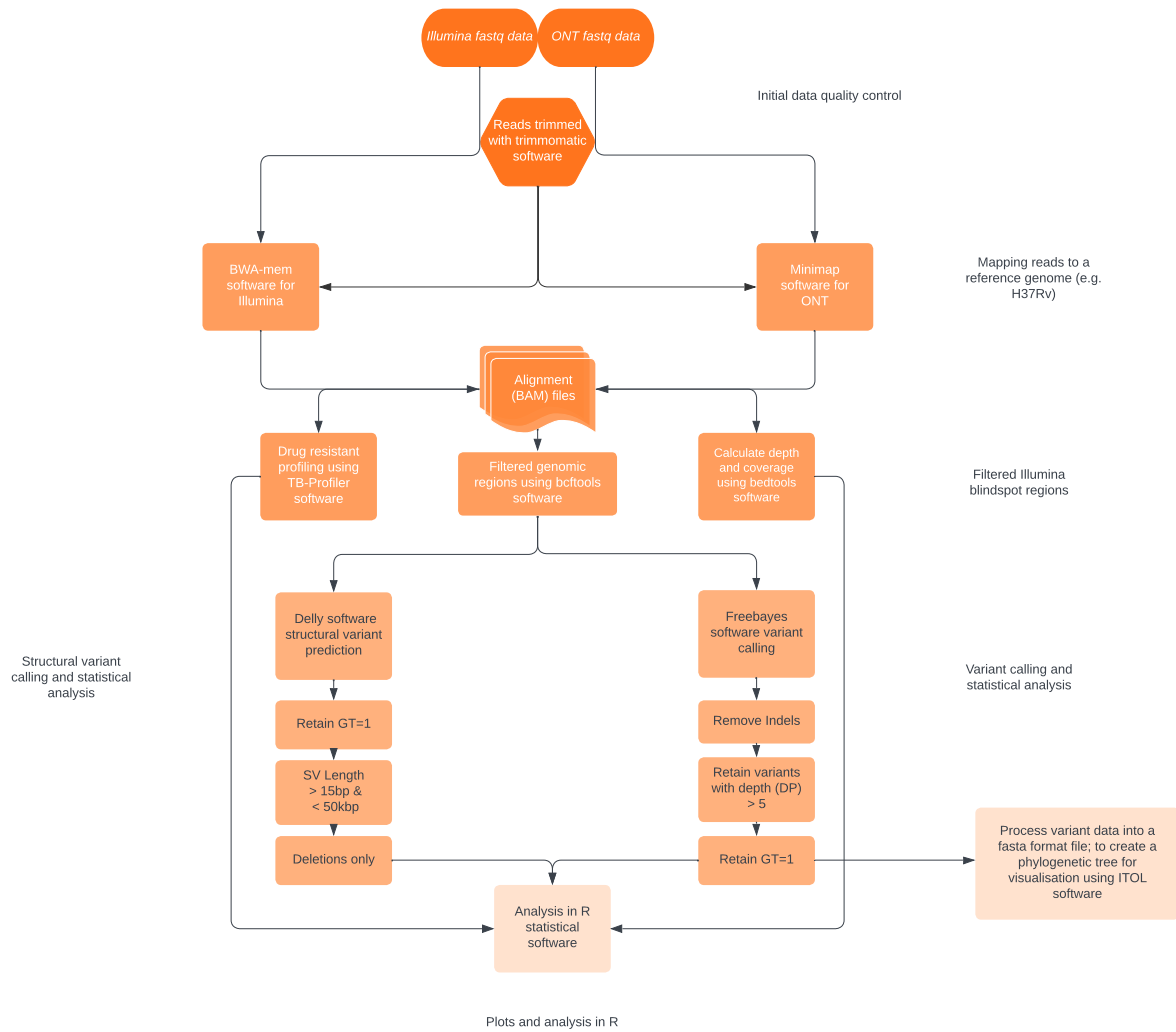

ONT = Oxford Nanopore Technology; DP = read depth parameter; GT = genotype parameter; indels = insertions and deletions; SV = structural variant

Figure S2

Comparison of average percentage coverage of genes between Illumina and Oxford Nanopore Technology (ONT) platforms, coloured by drug resistance (red), *pe/ppe* (blue) or other (black) gene category.

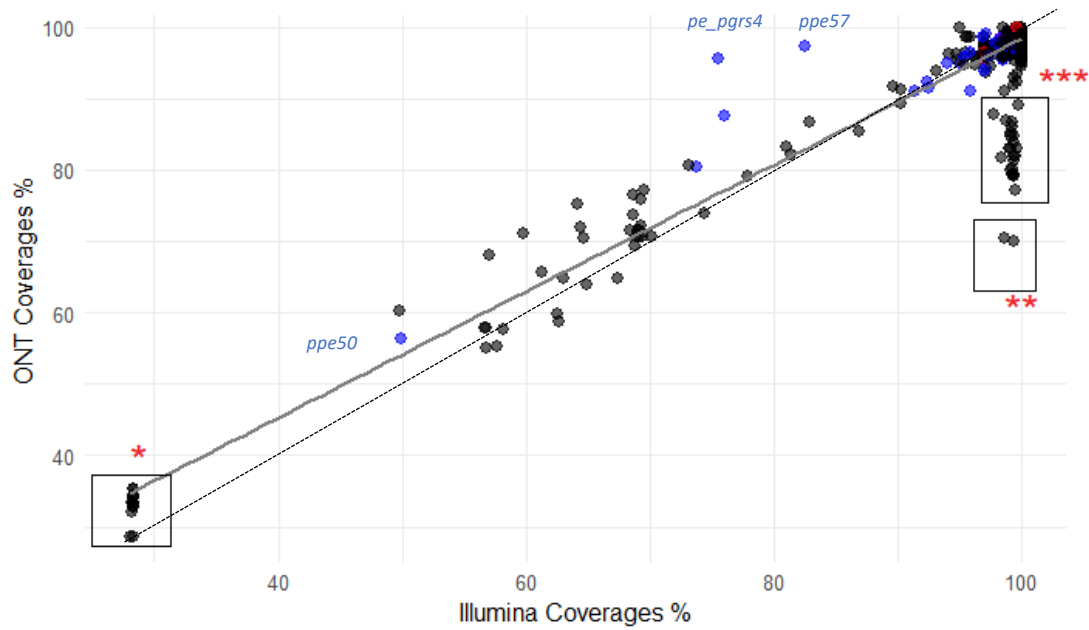

\* Genes within the region *Rv1573* to *Rv1586* (includes deletion RD3 linked to lineage 2)

\*\* Genes *Rv3474* and *Rv3475*

\*\*\* Genes *Rv0795*, *Rv0796*, *Rv1369c*, *Rv1370c*, *Rv1765*, *Rv2105*, *Rv2167*, *Rv2168c*, *Rv2479c*, *Rv2648*, *Rv2649*, *Rv3184*, *Rv3185*, *Rv3187*, *Rv3380*, and *Rv3381*

**Figure S3**

**Average coverage in genes across all 59 *M. tuberculosis* isolates for Illumina (top) and Oxford Nanopore Technology (bottom) platforms. Low coverage areas coincide with lineage-specific regions of difference (large deletions)**

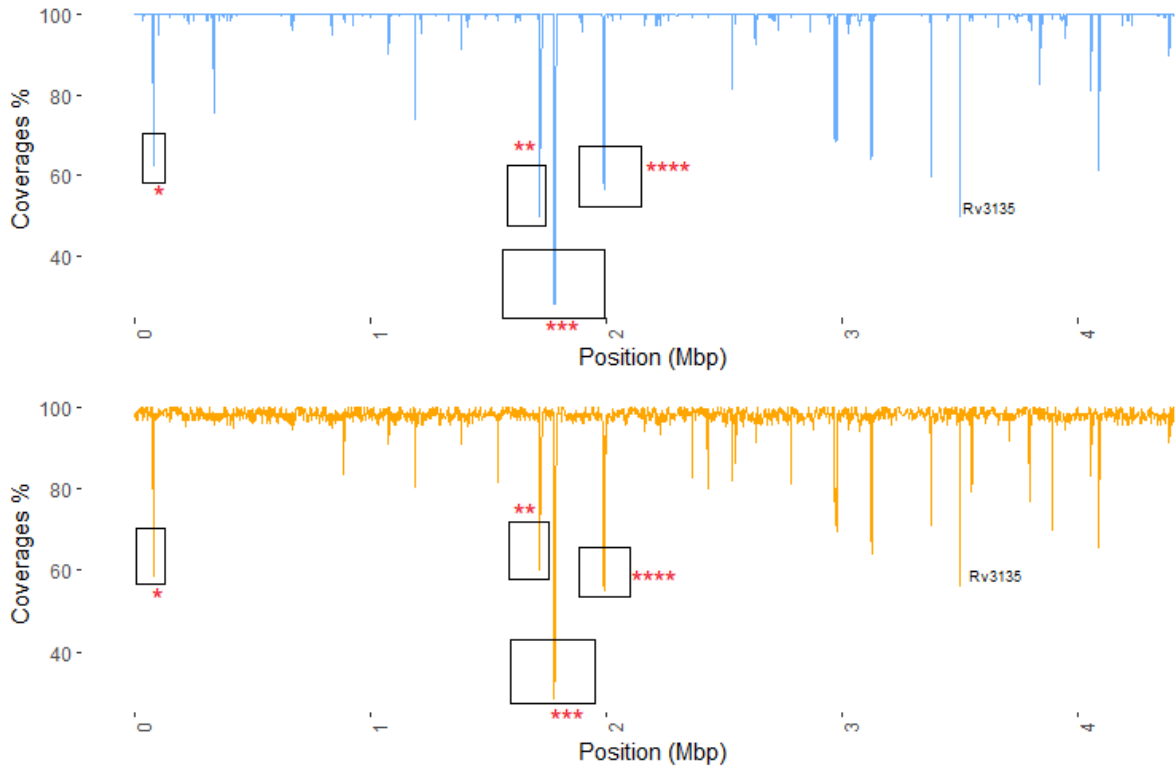

\* Rv0072 and Rv0073, \*\* Rv1524 and Rv1525, \*\*\* Rv1573-Rv1586, \*\*\*\* Rv1758-Rv1762c
